# Supplementary material
Source: Elsevier journal article supplement (https://authors.library.caltech.edu/64139/2/mmc1.pdf)

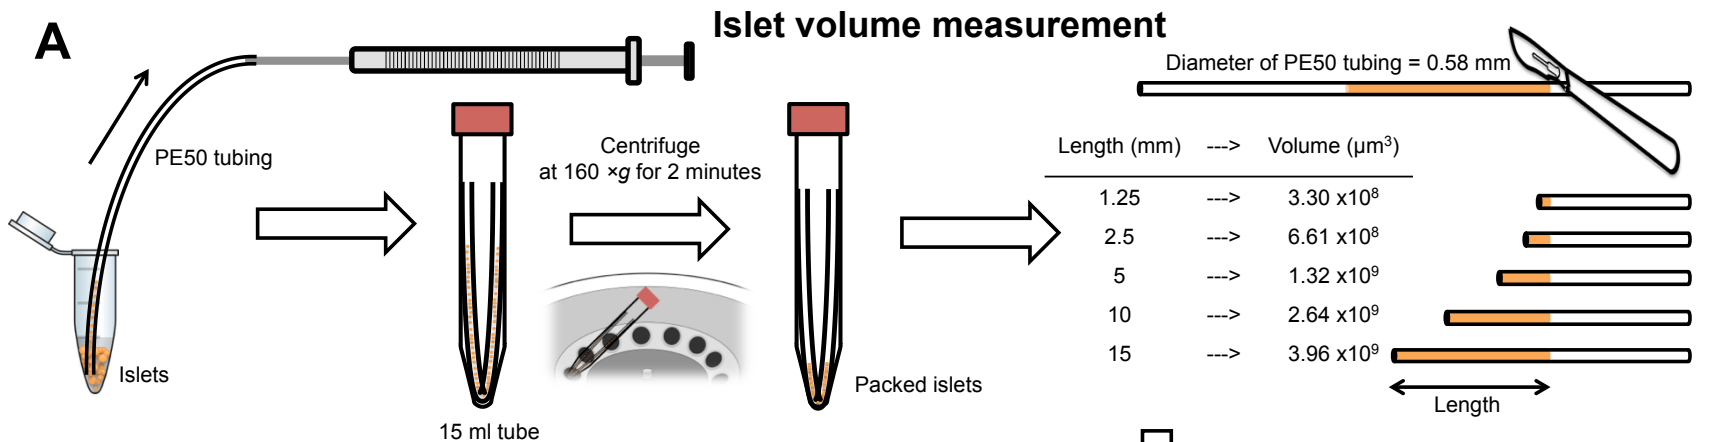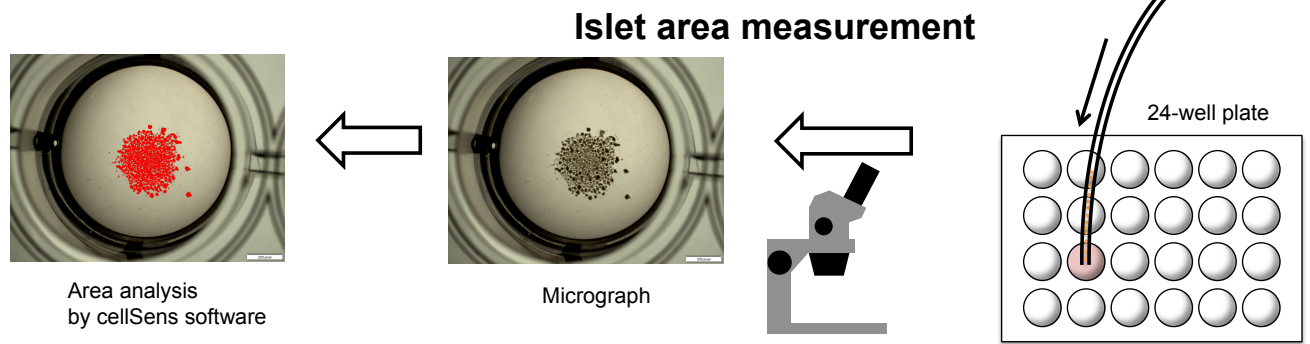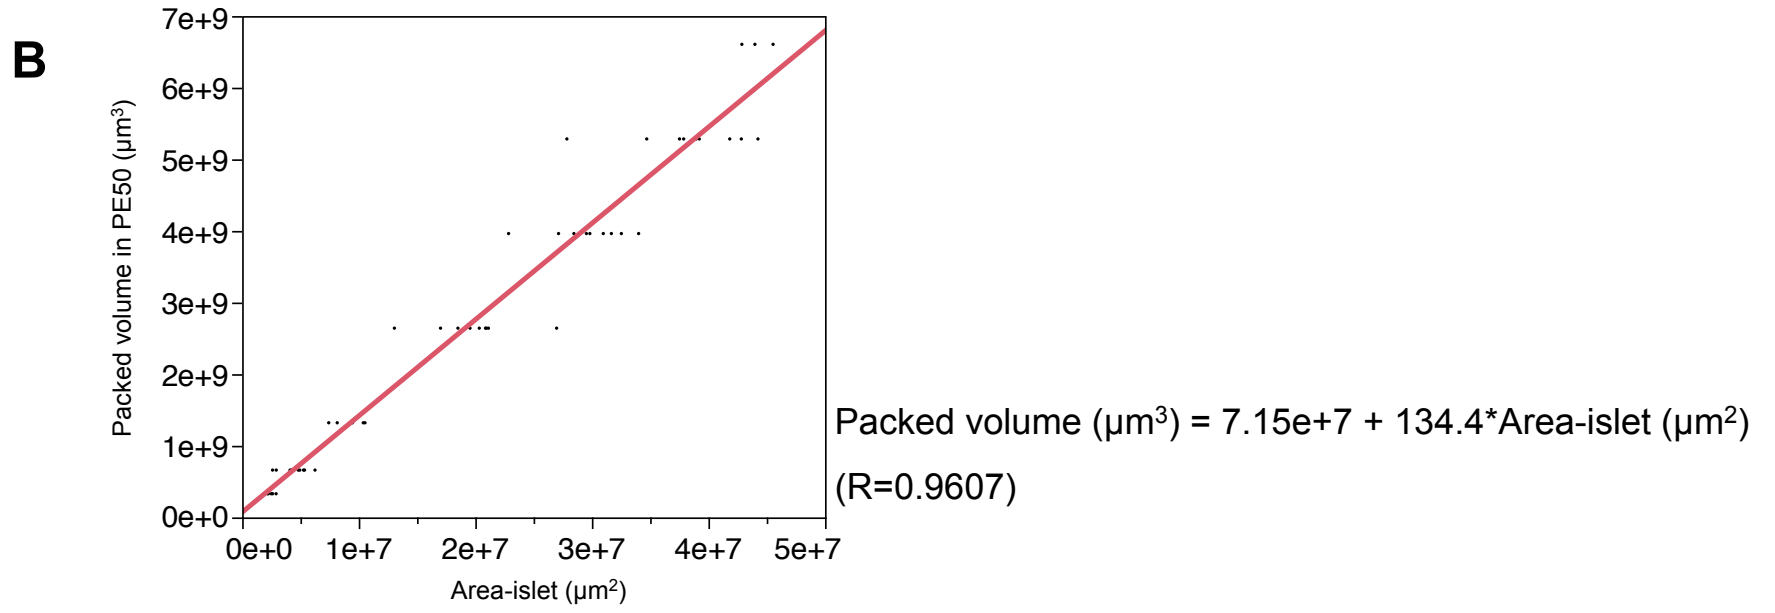

Supplement: mmc1 [file mmc1.pdf]
